# Supplementary material for: Activation of cGAS-STING Pathway Is Associated with MSI-H Stage IV Colorectal Cancer
Source: MDPI journal article supplement (doi:10.3390/cancers15010221), 2022-12-30
Supplement: s1 [file s1]

**Table S1.** Detailed clinicopathological characteristics of patients with stage IV CRC.

| Patient No | Gender | Age/years | MSI | Side | Grade | KRAS Muta-<br>tion | NRAS Muta-<br>tion | BRAF Muta-<br>tion | cGAS | STING |
|------------|--------|-----------|-----|------|-------|--------------------|--------------------|--------------------|------|-------|
| 1          | M      | 43        | H   | RC   | L     | No                 | No                 | No                 | L    | H     |
| 2          | F      | 75        | H   | RC   | H     | No                 | No                 | No                 | H    | H     |
| 3          | M      | 74        | H   | RC   | H     | Yes                | No                 | No                 | L    | L     |
| 4          | M      | 52        | H   | RC   | H     | No                 | No                 | Yes                | L    | L     |
| 5          | M      | 49        | H   | RC   | L     | No                 | No                 | No                 | H    | H     |
| 6          | M      | 83        | H   | RC   | L     | No                 | Yes                | No                 | H    | H     |
| 7          | M      | 78        | H   | LC   | L     | No                 | No                 | No                 | H    | H     |
| 8          | F      | 66        | H   | RC   | L     | Yes                | No                 | No                 | H    | H     |
| 9          | M      | 57        | H   | RC   | L     | No                 | No                 | No                 | L    | H     |
| 10         | F      | 65        | H   | RC   | L     | No                 | No                 | No                 | H    | H     |
| 11         | F      | 48        | H   | RC   | H     | No                 | No                 | No                 | L    | H     |
| 12         | M      | 62        | H   | RC   | L     | Yes                | No                 | No                 | H    | H     |
| 13         | F      | 73        | H   | RC   | H     | Yes                | No                 | No                 | L    | L     |
| 14         | M      | 57        | H   | RC   | H     | No                 | No                 | No                 | H    | H     |
| 15         | M      | 81        | H   | RC   | L     | No                 | No                 | Yes                | H    | H     |
| 16         | F      | 34        | H   | RC   | H     | No                 | No                 | Yes                | H    | H     |
| 17         | F      | 39        | H   | RC   | H     | No                 | No                 | No                 | H    | H     |
| 18         | M      | 67        | H   | R    | L     | No                 | No                 | Yes                | L    | H     |
| 19         | M      | 69        | H   | R    | L     | No                 | No                 | No                 | L    | H     |
| 20         | F      | 73        | H   | RC   | L     | No                 | No                 | Yes                | L    | H     |
| 21         | M      | 83        | H   | RC   | H     | No                 | No                 | No                 | L    | H     |
| 22         | F      | 54        | S   | R    | L     | No                 | No                 | No                 | L    | H     |
| 23         | F      | 51        | S   | R    | L     | No                 | No                 | No                 | H    | L     |
| 24         | F      | 74        | S   | RC   | H     | No                 | No                 | Yes                | L    | L     |
| 25         | M      | 65        | S   | RC   | H     | No                 | Yes                | No                 | H    | L     |
| 26         | M      | 58        | S   | LC   | L     | No                 | No                 | No                 | L    | H     |
| 27         | F      | 72        | S   | R    | L     | Yes                | No                 | No                 | L    | L     |
| 28         | M      | 80        | S   | LC   | L     | Yes                | No                 | No                 | H    | H     |
| 29         | M      | 77        | S   | RC   | H     | No                 | Yes                | No                 | L    | H     |
| 30         | M      | 63        | S   | LC   | L     | No                 | No                 | No                 | L    | H     |
| 31         | M      | 71        | S   | LC   | L     | No                 | No                 | No                 | L    | H     |
| 32         | M      | 55        | S   | LC   | L     | No                 | No                 | No                 | L    | H     |
| 33         | M      | 43        | S   | R    | L     | No                 | No                 | No                 | L    | H     |
| 34         | M      | 82        | S   | LC   | L     | Yes                | No                 | No                 | L    | L     |
| 35         | M      | 76        | S   | LC   | L     | No                 | No                 | No                 | L    | L     |
| 36         | F      | 82        | S   | LC   | L     | No                 | No                 | No                 | L    | L     |
| 37         | F      | 68        | S   | LC   | L     | No                 | Yes                | No                 | L    | L     |
| 38         | F      | 62        | S   | R    | L     | No                 | No                 | No                 | L    | H     |
| 39         | M      | 59        | S   | LC   | H     | Yes                | No                 | No                 | L    | L     |
| 40         | F      | 70        | S   | R    | L     | No                 | No                 | No                 | L    | H     |
| 41         | F      | 64        | S   | LC   | L     | No                 | No                 | No                 | L    | L     |

MSI: H—High-frequency microsatellite instability; S—microsatellite stable; RC—right colon; LC—left colon; R—rectum; KRAS—V-Ki-Ras2 Kirsten rat sarcoma 2 viral oncogene homolog; NRAS—neuroblastoma RAS viral oncogene homolog; BRAF—v-Raf murine sarcoma viral oncogene homolog B; cGAS—cyclic GMP-AMP synthase; STING—stimulator of IFN genes; L—low, H—high.
